# Supplementary material for: Poor Embryo Quality Is Associated With A Higher Risk of Low Birthweight in Vitrified-Warmed Single Embryo Transfer Cycles
Source: PubMed Central journal article supplement (PMC7243353; doi:10.3389/fphys.2020.00415), 2020-05-15
Supplement: Table_1.pdf [file Table_1.pdf]

Table S1-Types of congenital malformations among 2403 live born singletons.

| Malformation type             | ICD-10 code and diagnosis (n)                                                                                                                        | %(n/N)  |
|-------------------------------|------------------------------------------------------------------------------------------------------------------------------------------------------|---------|
| Circulatory system            | Q21.0: ventricular septal defect (2); Q21.1: atrial septal defect (3); Q21.3: tetralogy of Fallot (1); Q25.6: stenosis of pulmonary artery (1)       | 7(2.9)  |
| Digestive system              | Q31.8: congenital laryngomalacia (1); Q35.9: cleft palate (1); Q41.0: congenital duodenal atresia (1); Q43.3: congenital intestinal malformation (1) | 4(1.7)  |
| Urinary system                | Q62.0: congenital hydronephrosis (1)                                                                                                                 | 1(0.4)  |
| Musculoskeletal system        | Q65.8: congenital hip dysplasia (2)                                                                                                                  | 2(0.8)  |
| Nervous system                | Q03.9: congenital hydrocephalus (1); Q37.8: demyelinating Encephalopathy (1)                                                                         | 2(0.8)  |
| Other congenital malformation | Q11.1: congenital anophthalmia(1); Q28.8: congenital aneurysm (1); Q82.5: vascular nevus (2)                                                         | 4(1.7)  |
| Birth defects total           |                                                                                                                                                      | 20(8.3) |

Note: ICD-10 = International Classification of Diseases, 10th edition.
